# Supplementary figures and images for: Multi-anionic and -cationic compounds: new high entropy materials for advanced Li-ion batteries
Source: Royal Society of Chemistry journal article supplement (doi:10.1039/c9ee00368a), 2019-01-01

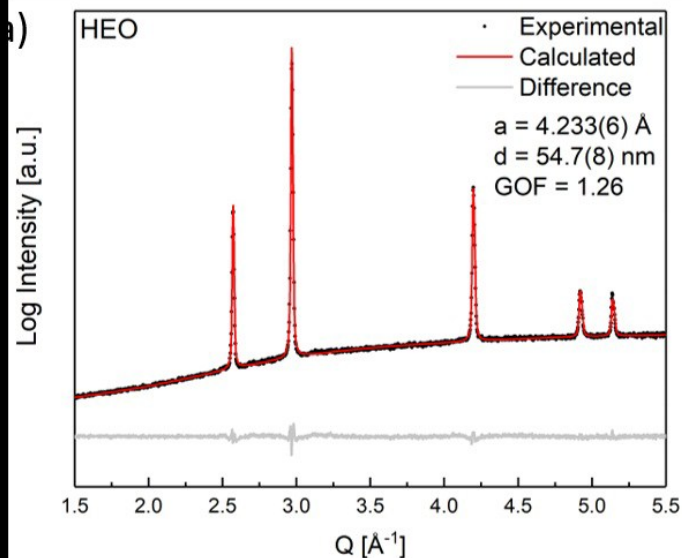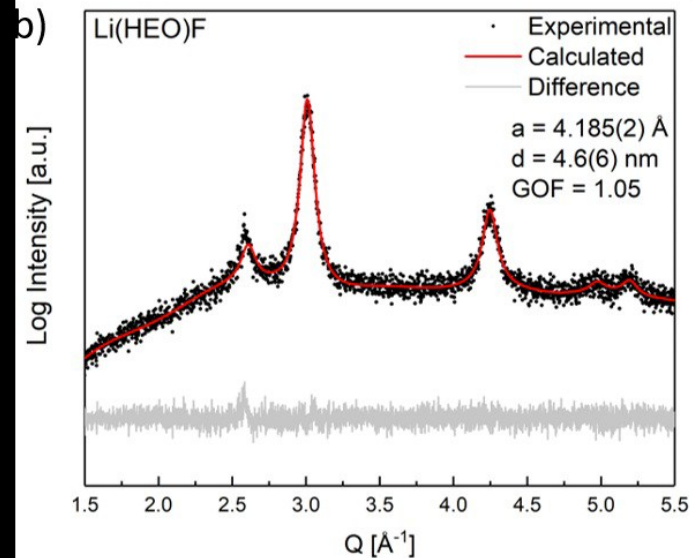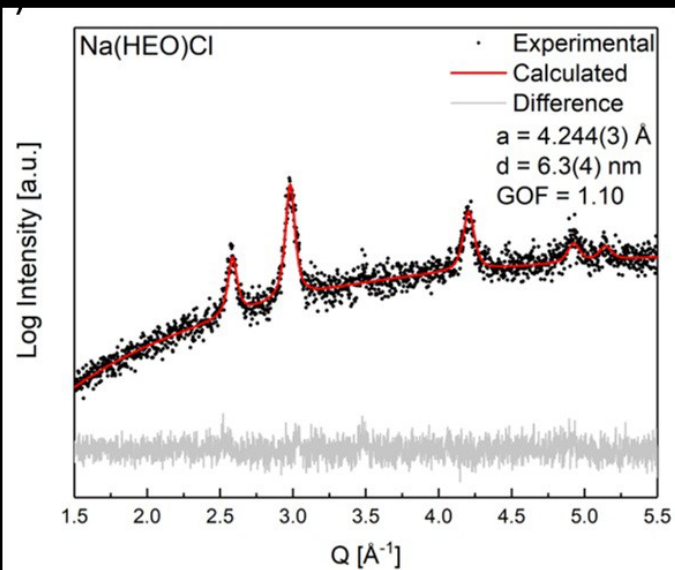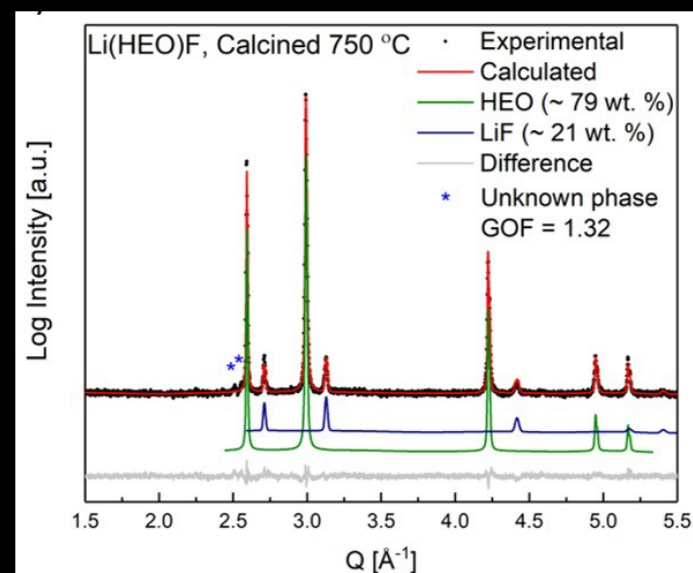

Supplement: c9ee00368a1.pdf [file c9ee00368a1.pdf]

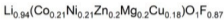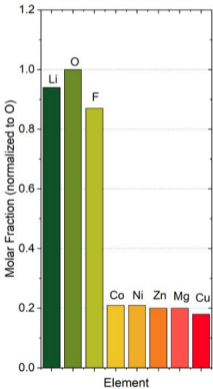

Supplement: c9ee00368a5.pdf [file c9ee00368a5.pdf]

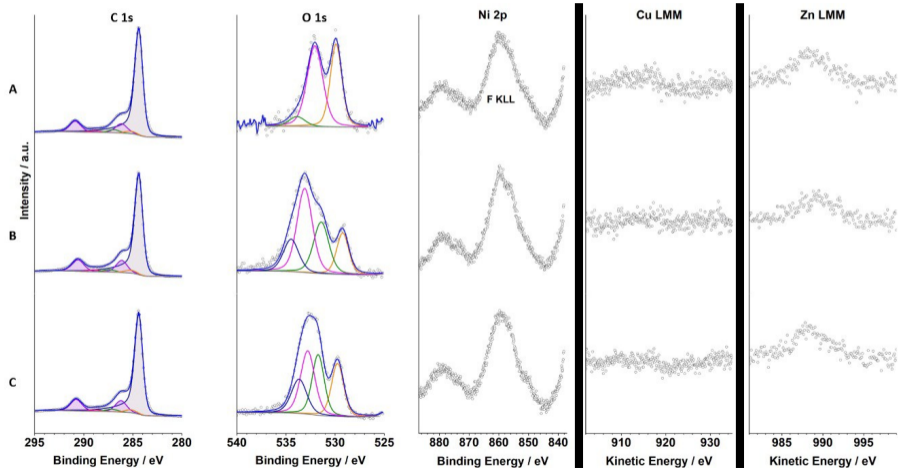

Supplement: c9ee00368a6.pdf [file c9ee00368a6.pdf]
